# Supplementary material for: Activity of the Chimeric Lysin ClyR against Common Gram-Positive Oral Microbes and Its Anticaries Efficacy in Rat Models
Source: PubMed Central journal article supplement (PMC6070986; doi:10.3390/v10070380), 2018-07-20
Supplement: viruses-10-00380-s001.pdf [file viruses-10-00380-s001.pdf]

## Supplementary Materials

### Activity of phage lysin ClyR against common Gram-positive oral microbes and its anti-caries efficacy in rat models

#### Supplementary materials and methods

**Bacteria DNA extraction.** 5 ml overnight cultures of *S. mutans* and *S. sobrinus* isolates were harvested and washed with 1ml of TE buffer (10 mM Tris base, 1 mM EDTA, pH 8.0). Then the cells were resuspended in 100 µl of TE, 50 µl of 10% sodium dodecyl sulfate was added and cells were incubated at 65°C for 30 min. The suspension was centrifuged (2000g, 5 min) and the supernatant was removed. After that, the tubes containing the cells were placed in a microwave oven (490 W) and heated for 3 min. The pellets were dissolved in 250 µl of TE and the tubes were frozen at -20°C. Before arbitrarily primed polymerase chain reaction (AP-PCR) assay, the suspension was melted, centrifuged and the supernatant was used in AP-PCR.

**AP-PCR assay.** AP-PCR was performed using primer 5'-AGGGGTCTTG-3' (OPA5). PCRs were carried out in a 25 µl reaction mixture containing 30-40 ng DNA template, 0.2 mM dNTPs, 0.2 µM primer, 1×*Easy Taq*<sup>®</sup> Buffer and 2.5 U *Easy Taq*<sup>®</sup> DNA polymerase (Transgen biotech, China) according to the manufacturer's recommendations. DNA amplification was performed in a thermalcycler (T100, Bio-Rad, USA) with an initial denaturation at 94°C for 5 min, followed by 35 cycles

24 of denaturation (94°C, 1 min), annealing (36°C, 2 min) and extension (72°C, 2 min).  
25 The final extension step was at 72°C for 7 min. PCR products were analyzed by  
26 electrophoresis with 1.5% agarose gel containing 1/10000 (v/v) GelRed (Biotium,  
27 USA) and visualized with transilluminator (ChemiDoc™ XRS+, Bio-Rad, USA). A  
28 Gene Ruler DNA ladder (Takara, China) was run as a molecular-size marker in one of  
29 the lanes. The AP-PCR fingerprints were analyzed by side-by-side visual comparison.  
30 Fingerprints were considered identical when all major bands were the same.

31

32

33

34

35

36

37

38

39

40

41

42

43

44

45

46 **Supplementary Tables and Figures**

47

48 **Table S1. Clinical *S. mutans* and *S. sobrinus* isolates used in this study.**

49

|                    | Strain No.                                                                    | Source                                                             | Genotyping results                                     |
|--------------------|-------------------------------------------------------------------------------|--------------------------------------------------------------------|--------------------------------------------------------|
| <i>S. sobrinus</i> | 1, 2, 3, 10, 11                                                               | One strain was isolated from each sample                           | Different genotypes                                    |
|                    | (4, 5); (6, 7); (8, 9)                                                        | The pair in brackets are two strains isolated from the same sample | The pair in brackets are the same genotype             |
| <i>S. mutans</i>   | 14, 17, 18 21, 28, 33, 34, 39, 44, 45                                         | One strain was isolated from each sample                           | Different genotypes                                    |
|                    | (12, 13); (15, 16); (19, 20); (29, 30); (31,32); (35, 36); (40, 41); (42, 43) | The pair in brackets are two strains isolated from the same sample | The pair in brackets are the same genotype             |
|                    | (37, 38); (46, 47)                                                            | The pair in brackets are two strains isolated from the same sample | The pair in brackets are different genotypes           |
|                    | 22, 23, 24                                                                    | Three strains isolated from the same sample                        | 22 and 23 are the same genotype, but different from 24 |
|                    | 25, 26, 27                                                                    | Three strains isolated from the same sample                        | Different genotypes                                    |

50

51

52

53

54

55

56

57

58

59

60

61

62

63

64

65

66

67

68

69 **Table S2. MBC of ClyR against clinical strains isolated from SECC-children**

70

| <i>S. mutans</i> |                             |         |                             |         |                             | <i>S. sobrinus</i> |                             |
|------------------|-----------------------------|---------|-----------------------------|---------|-----------------------------|--------------------|-----------------------------|
| Strains          | MBC<br>( $\mu\text{g/ml}$ ) | Strains | MBC<br>( $\mu\text{g/ml}$ ) | Strains | MBC<br>( $\mu\text{g/ml}$ ) | Strains            | MBC<br>( $\mu\text{g/ml}$ ) |
| 12               | 500                         | 24      | 500                         | 36      | 125                         | 1                  | 125                         |
| 13               | 500                         | 25      | 500                         | 37      | 500                         | 2                  | 250                         |
| 14               | 250                         | 26      | >1000                       | 38      | 125                         | 3                  | 250                         |
| 15               | 500                         | 27      | 250                         | 39      | 125                         | 4                  | 250                         |
| 16               | 500                         | 28      | 250                         | 40      | 500                         | 5                  | 500                         |
| 17               | 500                         | 29      | >1000                       | 41      | 500                         | 6                  | 500                         |
| 18               | 1000                        | 30      | >1000                       | 42      | 500                         | 7                  | 500                         |
| 19               | 250                         | 31      | 125                         | 43      | 250                         | 8                  | 250                         |
| 20               | 500                         | 32      | 500                         | 44      | 500                         | 9                  | 250                         |
| 21               | 250                         | 33      | 500                         | 45      | 250                         | 10                 | 250                         |
| 22               | 500                         | 34      | 250                         | 46      | 250                         | 11                 | 500                         |
| 23               | 250                         | 35      | 125                         | 47      | 250                         |                    |                             |

71

72

73

74

75

76

77

78

79

80 **Figure S1** The activity of ClyR in human saliva

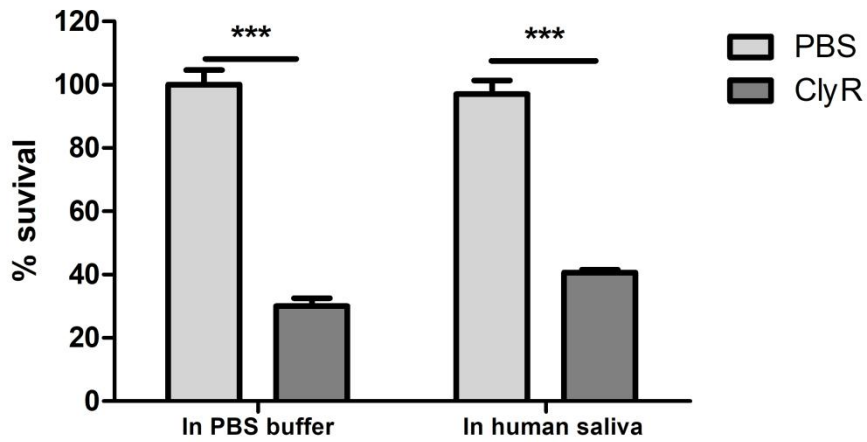

81

82 **Figure S1.** The activity of ClyR in human saliva. *S. mutans* MT8148 resuspended in  
83 PBS buffer or human saliva were treated with 25  $\mu\text{g/ml}$  of ClyR for 1 h at 37°C, then  
84 were serially diluted and plated onto BHI agar for counting. The Y-axis represents the  
85 bacteria survival rate of each group. \*\*\* $p < 0.001$ .

86

87

88

89

90

91

92

93

94

95

96

97

98

99

100

101

102

103

104

105

106

107

108

109 **Figure S2 Genotyping the clinical *S. sobrinus* (a) and *S. mutans* (b) isolates by**  
110 **AP-PCR.**

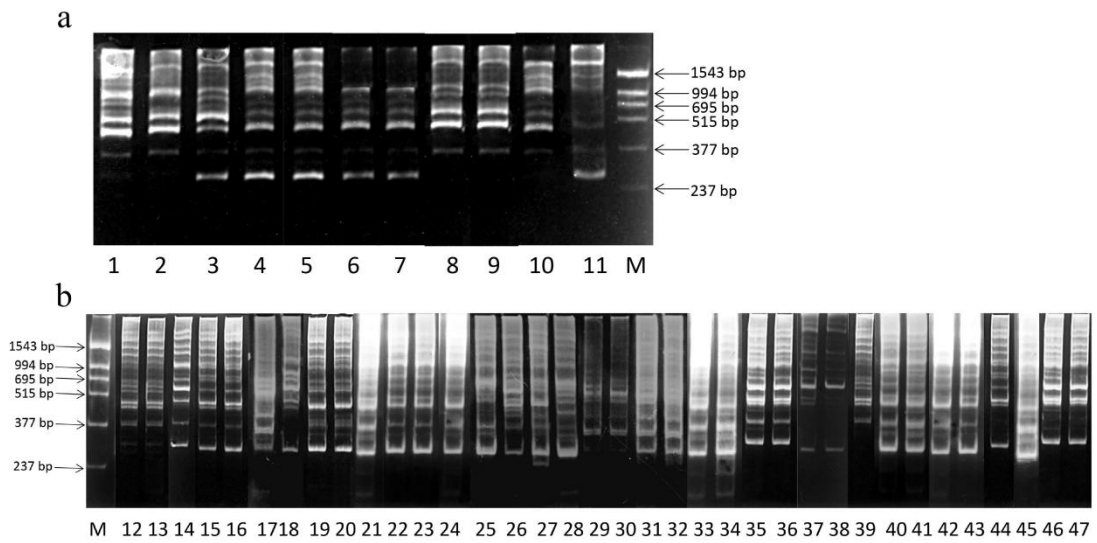

111  
112  
113  
114  
115  
116  
117  
118  
119  
120  
121  
122  
123
